# Supplementary material
Source: PubMed Central journal article supplement (PMC4337874)
Supplement: NIHMS659825-supplement-suppl_table.pdf [file NIHMS659825-supplement-suppl_table.pdf]

Supplemental Table 1. 20 single nucleotide polymorphisms (SNPs) previously associated with prostate cancer susceptibility used to create a genetic risk score

| SNP (Risk Allele)     | Chromosome (Gene) | References |
|-----------------------|-------------------|------------|
| <i>rs2660753 (T)</i>  | 3                 | (18)       |
| <i>rs9364554 (T)</i>  | 6                 | (18)       |
| <i>rs6465657 (C)</i>  | 7                 | (18)       |
| <i>rs10486567 (G)</i> | 7 (JAZF1)         | (1)        |
| <i>rs4242382 (A)</i>  | 8q24              | (1)        |
| <i>rs1447295 (A)</i>  | 8q24              | (23)       |
| <i>rs6983267 (G)</i>  | 8q24              | (24)       |
| <i>rs1571801 (A)</i>  | 9q33 (DAB2IP)     | (20)       |
| <i>rs7920517 (G)</i>  | 10                | (18)       |
| <i>rs4962416 (C)</i>  | 10                | (1)        |
| <i>rs10993994 (T)</i> | 10                | (18)       |
| <i>rs10896449 (G)</i> | 11q13             | (1)        |
| <i>rs4430796 (A)</i>  | 17q12             | (4)        |
| <i>rs11649743 (G)</i> | 17q12             | (22)       |
| <i>rs1859962 (G)</i>  | 17q24.3           | (4)        |
| <i>rs2659056 (G)</i>  | 19                | (18)       |
| <i>rs2735839 (G)</i>  | 19                | (18)       |
| <i>rs9623117 (C)</i>  | 22q13 (TNRC6B)    | (21)       |
| <i>rs5945572 (A)</i>  | Xp11.22           | (19)       |
| <i>rs5945619 (C)</i>  | X                 | (18)       |
